# Supplementary material for: Contrasting Effects of Elevated Salinity on Thermotolerance of Red Sea Stylophora pistillata and Indonesian Montipora digitata
Source: Research Square preprint supplement (doi:10.21203/rs.3.rs-8223576/v1), 2025-12-02
Supplement: Supplementary file 1 [file 934b890879c1b30c530e1fd3.xlsx]

## Sheet: General information
Tim Wijgerde, Michael Yeboah, Thomas van de Grootevheen, Tom Roebbers, Rick Verkooijen, Rosa van der Ven, Ronald Osinga
Marine Animal Ecology, Wageningen University, Wageningen University and Research, Wageningen, The Netherlands
The tab All data contains all data used for statistical analysis, which was done in SPSS 29.

## Sheet: All data
Coral_Species	Temperature	Salinity	ps0	ps1	ps2	ps3	ps4	ps5	ps6	ps7	ps8	ps9	ps10	ps11	ps12	ps13	ps14	ps15	ps16	ps17	ps18	ps19	ps20	ps21	ps22	ps23	ps24	ps25	ps26	ps27	ps28	ps29	ps30	ps31	ps32	ps33	ps34	ps35	ps36	ps37	ps38	ps39	ps40	ps41	ps42	ps43	ps44	ps45	ps46
Montipora digitata	Control	35 PSU	0.721	0.771375	0.699125	0.771875	0.785375	0.787375	0.75475	0.740625	0.7435	0.748	0.772875	0.788875	0.777	0.77375	0.783625	0.73475	0.729375	0.662875	0.74725	0.70375	0.7575	0.72675	0.72175	0.746625	0.731	0.729625	0.70975	0.647875	0.7195	0.68	0.647625	0.72275	0.71625	0.668125	0.699625	0.6755	0.68125	0.681625	0.737375	0.665125	0.725125	0.716	0.67825	0.6635	0.697	0.62525	0.68425
Montipora digitata	Control	35 PSU	0.73625	0.733375	0.796625	0.815625	0.778875	0.779	0.777625	0.774625	0.7715	0.770375	0.751	0.7445	0.75275	0.744	0.730875	0.7715	0.701625	0.7015	0.755	0.758875	0.75425	0.716	0.72175	0.726875	0.70525	0.694125	0.703125	0.64475	0.6905	0.652625	0.661875	0.66825	0.714	0.69475	0.698125	0.70675	0.697375	0.691375	0.6795	0.68425	0.7015	0.680375	0.6685	0.665125	0.67625	0.643	0.691
Montipora digitata	Control	35 PSU	0.7335	0.691375	0.72175	0.785375	0.749375	0.753	0.775875	0.744375	0.777375	0.723375	0.75075	0.775875	0.76225	0.734125	0.735625	0.702625	0.7025	0.735625	0.75075	0.708125	0.73475	0.71825	0.675125	0.717	0.680625	0.6655	0.67575	0.69475	0.677	0.68275	0.68075	0.700625	0.67225	0.710875	0.649	0.6925	0.675875	0.69	0.667875	0.727125	0.68525	0.658	0.65725	0.65525	0.62625	0.686	0.68225
Montipora digitata	Control	35 PSU	0.74975	0.74125	0.729375	0.716375	0.7405	0.694625	0.749125	0.728125	0.7505	0.759625	0.779	0.7605	0.753	0.76025	0.738375	0.71375	0.694	0.7385	0.7235	0.7205	0.72	0.69625	0.697375	0.732375	0.681625	0.69825	0.69125	0.670125	0.67475	0.660625	0.6535	0.6475	0.694	0.695375	0.67325	0.668125	0.688875	0.671	0.66525	0.63475	0.679875	0.649375	0.64325	0.66775	0.66925	0.649	0.673
Montipora digitata	Heatwave	35 PSU	0.715875	0.742	0.769625	0.795375	0.766875	0.76825	0.766	0.804	0.75675	0.728125	0.7835	0.7045	0.80025	0.7275	0.765	0.72725	0.694125	0.719625	0.751	0.738	0.71125	0.7195	0.726125	0.73925	0.698	0.70625	0.691375	0.6975	0.676875	0.66225	0.67025	0.701	0.71575	0.703	0.68175	0.686125	0.71775	0.68875	0.71375	0.715875	0.68825	0.69075	0.664625	0.62925	0.68925	0.62775	0.667
Montipora digitata	Heatwave	35 PSU	0.689375	0.770125	0.739875	0.7715	0.751	0.74375	0.823625	0.74425	0.754875	0.750875	0.77075	0.748125	0.776375	0.745625	0.711875	0.72	0.683	0.726875	0.699125	0.752625	0.689125	0.727	0.70075	0.730375	0.698375	0.667375	0.6675	0.736	0.664875	0.679625	0.654125	0.695375	0.708	0.689625	0.687125	0.691125	0.7295	0.702	0.6735	0.6835	0.702	0.680625	0.67775	0.657875	0.639	0.737	0.59275
Montipora digitata	Heatwave	35 PSU	0.7065	0.710125	0.708625	0.716	0.7715	0.765875	0.78375	0.793	0.738375	0.732625	0.729125	0.75625	0.745	0.742125	0.7305	0.7125	0.756875	0.71675	0.707	0.72675	0.74675	0.719875	0.71325	0.694	0.728125	0.681875	0.681375	0.675125	0.676	0.671625	0.682125	0.681875	0.682	0.689875	0.690125	0.686375	0.70525	0.698125	0.702125	0.711875	0.6765	0.684125	0.685875	0.669125	0.64775	0.70325	0.599
Montipora digitata	Heatwave	35 PSU	0.68975	0.720125	0.716125	0.771	0.736	0.76775	0.784	0.75725	0.72825	0.74725	0.771375	0.740625	0.70325	0.744875	0.770875	0.744375	0.730625	0.673875	0.676	0.73075	0.735875	0.7325	0.722	0.71125	0.704875	0.70825	0.715125	0.685875	0.692875	0.682875	0.704125	0.674625	0.691375	0.67675	0.724875	0.68825	0.70875	0.715125	0.719875	0.71525	0.71575	0.732125	0.665375	0.694875	0.66275	0.6245	0.548
Montipora digitata	Control	42 PSU	0.750375	0.685	0.69475	0.706125	0.719875	0.736	0.763	0.75625	0.78375	0.71275	0.748125	0.762375	0.758625	0.75175	0.729625	0.7275	0.68375	0.71125	0.725375	0.71525	0.716125	0.67575	0.67225	0.6995	0.71475	0.686125	0.71225	0.672625	0.643875	0.66175	0.629375	0.701125	0.668125	0.66525	0.650375	0.658	0.7035	0.695875	0.67275	0.66525	0.679875	0.6365	0.672125	0.651125	0.64125	0.624	0.68825
Montipora digitata	Control	42 PSU	0.74125	0.68825	0.73	0.717625	0.70425	0.70675	0.78625	0.773	0.751875	0.724625	0.712875	0.73825	0.762375	0.71975	0.696875	0.75875	0.722	0.719875	0.68075	0.742875	0.7425	0.68075	0.6625	0.68725	0.674125	0.67575	0.659375	0.665125	0.66975	0.637	0.626625	0.648625	0.693125	0.695375	0.6565	0.64975	0.68725	0.700375	0.679875	0.678625	0.6995	0.69025	0.692625	0.68575	0.67925	0.68475	0.6555
Montipora digitata	Control	42 PSU	0.69475	0.718	0.68625	0.690375	0.711375	0.751625	0.768875	0.75125	0.763	0.7395	0.76925	0.680375	0.719125	0.7535	0.735125	0.740125	0.71525	0.723875	0.71325	0.708125	0.7	0.719375	0.677	0.68775	0.691	0.681125	0.65925	0.640875	0.67975	0.61825	0.619375	0.68125	0.692	0.670625	0.652625	0.717	0.678375	0.685875	0.69475	0.72475	0.736125	0.695625	0.680625	0.674875	0.67475	0.67225	0.657
Montipora digitata	Control	42 PSU	0.699875	0.728875	0.71475	0.709125	0.768	0.752375	0.79875	0.754875	0.769125	0.7285	0.754	0.660625	0.75025	0.762125	0.698625	0.703875	0.719375	0.716	0.681	0.726625	0.721625	0.665125	0.643375	0.721	0.675375	0.66125	0.685875	0.6475	0.68075	0.628125	0.681625	0.695375	0.665125	0.654	0.641625	0.69725	0.686625	0.647375	0.696125	0.698625	0.711	0.656125	0.67625	0.666875	0.70925	0.7275	0.69925
Montipora digitata	Heatwave	42 PSU	0.69975	0.681375	0.71975	0.75775	0.719375	0.73775	0.729	0.703	0.6975	0.75325	0.751625	0.68725	0.76875	0.72425	0.704375	0.73975	0.66525	0.70825	0.6895	0.69575	0.7235	0.738	0.669	0.661375	0.696625	0.650375	0.6525	0.686125	0.68775	0.6485	0.677125	0.704125	0.680875	0.6745	0.69775	0.7085	0.679875	0.65925	0.66375	0.67625	0.679625	0.589625	0.622875	0.562125	#NULL!	#NULL!	#NULL!
Montipora digitata	Heatwave	42 PSU	0.713375	0.6945	0.7345	0.702625	0.721625	0.7685	0.74425	0.768125	0.748	0.732625	0.7405	0.737625	0.7625	0.7505	0.747625	0.689875	0.7165	0.699125	0.746375	0.72625	0.724125	0.706625	0.692375	0.717	0.703875	0.673875	0.679625	0.674375	0.703125	0.64825	0.679375	0.685375	0.68175	0.66275	0.67775	0.6825	0.731	0.697125	0.6465	0.6675	0.683625	0.638875	0.63775	0.524875	#NULL!	#NULL!	#NULL!
Montipora digitata	Heatwave	42 PSU	0.706125	0.703875	0.7205	0.7735	0.759	0.78575	0.732125	0.80125	0.7695	0.739625	0.784	0.69825	0.773375	0.761	0.753125	0.72775	0.691	0.735875	0.694	0.732	0.735375	0.743625	0.709	0.685875	0.708625	0.68725	0.667125	0.706625	0.71475	0.669125	0.645625	0.736125	0.69	0.716625	0.7	0.73025	0.71075	0.685875	0.677	0.652625	0.6915	0.6255	0.587375	0.584125	#NULL!	#NULL!	#NULL!
Montipora digitata	Heatwave	42 PSU	0.689875	0.66875	0.709875	0.816625	0.7615	0.789375	0.76	0.778375	0.776625	0.730125	0.749	0.682625	0.748875	0.766125	0.741	0.715	0.716875	0.70825	0.727625	0.740125	0.6955	0.711125	0.70275	0.70675	0.738125	0.709	0.6715	0.682625	0.69275	0.677875	0.680375	0.6915	0.701125	0.6985	0.728625	0.701125	0.72075	0.702625	0.699125	0.64375	0.692125	0.641875	0.64125	0.501	#NULL!	#NULL!	#NULL!
Stylophora pistillata	Control	35 PSU	0.68275	0.733125	0.717375	0.734	0.745625	0.718125	0.743375	0.725125	0.773625	0.762875	0.746125	0.754	0.7635	0.759125	0.74275	0.71925	0.695	0.707	0.679875	0.701375	0.76425	0.699375	0.703	0.715625	0.717875	0.7145	0.71725	0.687	0.704875	0.665875	0.700875	0.713625	0.711375	0.706375	0.6775	0.694375	0.692625	0.717375	0.71975	0.717	0.719	0.73475	0.699625	0.675625	0.691125	0.684	0.684125
Stylophora pistillata	Control	35 PSU	0.70875	0.676875	0.761875	0.7725	0.7285	0.7625	0.7325	0.74125	0.7485	0.72225	0.759	0.71825	0.758	0.745125	0.7185	0.68	0.6905	0.719375	0.683875	0.726	0.716	0.731625	0.71075	0.702625	0.736375	0.720125	0.705625	0.69475	0.6825	0.679625	0.69925	0.718	0.717875	0.728875	0.67425	0.718875	0.687375	0.716875	0.73375	0.692	0.742375	0.705625	0.687375	0.686125	0.665625	0.68525	0.683125
Stylophora pistillata	Control	35 PSU	0.70375	0.69225	0.744125	0.7075	0.768	0.7265	0.802125	0.7495	0.766	0.721875	0.763	0.748375	0.774875	0.723375	0.72175	0.676875	0.6805	0.70425	0.705125	0.726375	0.7485	0.69975	0.73925	0.71125	0.7315	0.705375	0.698125	0.661625	0.6885	0.684375	0.6815	0.7085	0.69475	0.68825	0.65325	0.718	0.689875	0.734875	0.710125	0.715125	0.69525	0.6865	0.68	0.721	0.702625	0.70175	0.642
Stylophora pistillata	Control	35 PSU	0.80775	0.77475	0.78175	0.74225	0.780625	0.726125	0.7665	0.7225	0.792875	0.708875	0.779125	0.733625	0.749375	0.76275	0.749	0.6775	0.687125	0.727	0.680125	0.727875	0.746875	0.714	0.68875	0.72025	0.708875	0.698125	0.683375	0.718625	0.66725	0.69025	0.672375	0.701625	0.7185	0.667875	0.642625	0.69875	0.717375	0.7305	0.719625	0.713375	0.7335	0.671625	0.6765	0.678875	0.70875	0.67175	0.682375
Stylophora pistillata	Heatwave	35 PSU	0.6945	0.68225	0.74625	0.779	0.724625	0.755375	0.757375	0.72625	0.75725	0.68875	0.752875	0.723875	0.735	0.7505	0.725875	0.724625	0.679	0.72	0.693	0.70625	0.696125	0.725625	0.693625	0.698125	0.72775	0.665625	0.68325	0.682	0.6585	0.651375	0.661875	0.6855	0.735125	0.670625	0.684375	0.690875	0.69525	0.692875	0.678375	0.728	0.66075	0.675625	0.675	0.6425	0.688875	0.683375	0.645375
Stylophora pistillata	Heatwave	35 PSU	0.680625	0.668	0.773125	0.75175	0.763625	0.7015	0.755875	0.741625	0.794625	0.7315	0.718	0.732875	0.74925	0.73075	0.720375	0.681875	0.703375	0.723625	0.690875	0.696625	0.700375	0.724875	0.72925	0.70925	0.74575	0.66475	0.67575	0.68225	0.69475	0.65325	0.69075	0.6815	0.683125	0.671625	0.690125	0.661625	0.693125	0.6795	0.6855	0.656	0.713125	0.69025	0.68225	0.6915	0.667	0.70275	0.646125
Stylophora pistillata	Heatwave	35 PSU	0.70825	0.732625	0.690875	0.77075	0.69875	0.749875	0.76625	0.74625	0.777875	0.739625	0.78475	0.74	0.7725	0.7585	0.7045	0.6985	0.728375	0.688125	0.693875	0.732125	0.737	0.73175	0.718625	0.705125	0.7055	0.735375	0.69425	0.6955	0.7105	0.6725	0.65425	0.706875	0.70275	0.658375	0.686625	0.70075	0.71925	0.718	0.69675	0.677625	0.688	0.6895	0.695875	0.682125	0.7	0.675625	0.7105
Stylophora pistillata	Heatwave	35 PSU	0.671125	0.6975	0.71075	0.722625	0.730875	0.71275	0.772	0.743875	0.768875	0.70075	0.730875	0.724375	0.75025	0.765	0.703	0.684875	0.715125	0.70475	0.701375	0.72275	0.706375	0.711	0.709125	0.72375	0.723125	0.676375	0.68175	0.66375	0.696	0.690625	0.691	0.675125	0.700625	0.688625	0.65675	0.688	0.682875	0.70725	0.688625	0.680625	0.723375	0.70175	0.684125	0.695	0.642125	0.66375	0.65125
Stylophora pistillata	Control	42 PSU	0.763	0.670125	0.658875	0.72275	0.759625	0.747875	0.758	0.728625	0.714625	0.682	0.73575	0.76875	0.74225	0.756125	0.716375	0.679625	0.706	0.709	0.72775	0.73475	0.726	0.693	0.688	0.68625	0.698125	0.702	0.659125	0.661375	0.685125	0.6625	0.656125	0.69525	0.6765	0.66925	0.662125	0.67625	0.729125	0.713625	0.680625	0.655	0.697375	0.667125	0.67825	0.699875	0.633375	0.688	0.656
Stylophora pistillata	Control	42 PSU	0.72875	0.6775	0.776125	0.7275	0.7545	0.784875	0.732	0.7095	0.739625	0.701	0.777	0.6735	0.75525	0.750625	0.718375	0.71275	0.7455	0.68525	0.72875	0.725625	0.72575	0.722625	0.70275	0.73175	0.698625	0.6805	0.699125	0.691125	0.71625	0.67275	0.690625	0.69075	0.713625	0.67825	0.683375	0.700375	0.723375	0.703	0.70825	0.707	0.7285	0.691	0.706	0.686375	0.68025	0.7005	0.73225
Stylophora pistillata	Control	42 PSU	0.7355	0.742	0.767375	0.7535	0.749625	0.755875	0.771	0.7585	0.74025	0.722375	0.80025	0.705625	0.7555	0.7445	0.736375	0.719125	0.690625	0.68925	0.737375	0.716625	0.698625	0.719875	0.72175	0.705375	0.707125	0.734375	0.71925	0.70625	0.7125	0.664125	0.707375	0.711625	0.698	0.70925	0.700125	0.7175	0.705375	0.70525	0.74125	0.711375	0.72575	0.705125	0.696125	0.66175	0.703375	0.697875	0.6705
Stylophora pistillata	Control	42 PSU	0.7305	0.70225	0.695375	0.751375	0.678875	0.77575	0.7415	0.738625	0.765875	0.7845	0.692625	0.72375	0.749625	0.765125	0.740625	0.728375	0.7075	0.713	0.7145	0.72025	0.712875	0.693125	0.708625	0.675375	0.68725	0.669875	0.71075	0.664875	0.685625	0.655125	0.671	0.67125	0.691625	0.6635	0.6395	0.688625	0.6725	0.666125	0.661625	0.666	0.658625	0.6545	0.685875	0.686625	0.637875	0.685875	0.64625
Stylophora pistillata	Heatwave	42 PSU	0.702625	0.696	0.6805	0.75825	0.726	0.71675	0.752375	0.731625	0.723875	0.738125	0.75	0.753125	0.752	0.751875	0.730125	0.693875	0.6715	0.7655	0.6975	0.711375	0.711625	0.7125	0.661	0.723	0.71275	0.7105	0.66775	0.66825	0.681125	0.64925	0.657	0.7095	0.704125	0.705125	0.65275	0.697875	0.683625	0.698625	0.701375	0.709	0.7195	0.678875	0.74125	0.68875	0.6585	0.69175	0.721
Stylophora pistillata	Heatwave	42 PSU	0.692625	0.700875	0.74325	0.711375	0.703875	0.7595	0.740125	0.74525	0.7445	0.73025	0.726375	0.724125	0.73425	0.734125	0.73125	0.6785	0.675375	0.69175	0.726625	0.741125	0.745	0.73325	0.703125	0.696375	0.7445	0.67375	0.690625	0.671875	0.685625	0.65625	0.669	0.721	0.724	0.685125	0.701875	0.704625	0.71475	0.701	0.6445	0.680375	0.72975	0.715875	0.708375	0.68825	0.6545	0.69475	0.71175
Stylophora pistillata	Heatwave	42 PSU	0.659	0.716	0.740625	0.7405	0.709125	0.701	0.722375	0.751	0.753	0.69625	0.714125	0.6845	0.78275	0.719125	0.72475	0.70875	0.680875	0.6995	0.67725	0.7005	0.728625	0.703375	0.68175	0.72975	0.710875	0.681125	0.674875	0.681625	0.68275	0.653875	0.682875	0.734875	0.708625	0.66675	0.648375	0.695375	0.673	0.659625	0.697125	0.655375	0.7305	0.669375	0.6895	0.669875	0.65275	0.671	0.69275
Stylophora pistillata	Heatwave	42 PSU	0.677625	0.667625	0.736125	0.739	0.73425	0.744875	0.74525	0.76125	0.724625	0.7445	0.749625	0.6915	0.754	0.78025	0.74675	0.668	0.686875	0.716875	0.732	0.71	0.68525	0.71	0.718625	0.68475	0.70325	0.70575	0.66475	0.692375	0.749625	0.63225	0.674375	0.69725	0.669125	0.688625	0.704625	0.69	0.692875	0.694375	0.689625	0.682625	0.711	0.697875	0.72375	0.651875	0.730875	0.663625	0.670875
#NULL!	#NULL!	#NULL!	#NULL!	#NULL!	#NULL!	#NULL!	#NULL!	#NULL!	#NULL!	#NULL!	#NULL!	#NULL!	#NULL!	#NULL!	#NULL!	#NULL!	#NULL!	#NULL!	#NULL!	#NULL!	#NULL!	#NULL!	#NULL!	#NULL!	#NULL!	#NULL!	#NULL!	#NULL!	#NULL!	#NULL!	#NULL!	#NULL!	#NULL!	#NULL!	#NULL!	#NULL!	#NULL!	#NULL!	#NULL!	#NULL!	#NULL!	#NULL!	#NULL!	#NULL!	#NULL!	#NULL!	#NULL!	#NULL!	#NULL!
#NULL!	#NULL!	#NULL!	#NULL!	#NULL!	#NULL!	#NULL!	#NULL!	#NULL!	#NULL!	#NULL!	#NULL!	#NULL!	#NULL!	#NULL!	#NULL!	#NULL!	#NULL!	#NULL!	#NULL!	#NULL!	#NULL!	#NULL!	#NULL!	#NULL!	#NULL!	#NULL!	#NULL!	#NULL!	#NULL!	#NULL!	#NULL!	#NULL!	#NULL!	#NULL!	#NULL!	#NULL!	#NULL!	#NULL!	#NULL!	#NULL!	#NULL!	#NULL!	#NULL!	#NULL!	#NULL!	#NULL!	#NULL!	#NULL!	#NULL!
#NULL!	#NULL!	#NULL!	#NULL!	#NULL!	#NULL!	#NULL!	#NULL!	#NULL!	#NULL!	#NULL!	#NULL!	#NULL!	#NULL!	#NULL!	#NULL!	#NULL!	#NULL!	#NULL!	#NULL!	#NULL!	#NULL!	#NULL!	#NULL!	#NULL!	#NULL!	#NULL!	#NULL!	#NULL!	#NULL!	#NULL!	#NULL!	#NULL!	#NULL!	#NULL!	#NULL!	#NULL!	#NULL!	#NULL!	#NULL!	#NULL!	#NULL!	#NULL!	#NULL!	#NULL!	#NULL!	#NULL!	#NULL!	#NULL!	#NULL!
#NULL!	#NULL!	#NULL!	#NULL!	#NULL!	#NULL!	#NULL!	#NULL!	#NULL!	#NULL!	#NULL!	#NULL!	#NULL!	#NULL!	#NULL!	#NULL!	#NULL!	#NULL!	#NULL!	#NULL!	#NULL!	#NULL!	#NULL!	#NULL!	#NULL!	#NULL!	#NULL!	#NULL!	#NULL!	#NULL!	#NULL!	#NULL!	#NULL!	#NULL!	#NULL!	#NULL!	#NULL!	#NULL!	#NULL!	#NULL!	#NULL!	#NULL!	#NULL!	#NULL!	#NULL!	#NULL!	#NULL!	#NULL!	#NULL!	#NULL!
#NULL!	#NULL!	#NULL!	#NULL!	#NULL!	#NULL!	#NULL!	#NULL!	#NULL!	#NULL!	#NULL!	#NULL!	#NULL!	#NULL!	#NULL!	#NULL!	#NULL!	#NULL!	#NULL!	#NULL!	#NULL!	#NULL!	#NULL!	#NULL!	#NULL!	#NULL!	#NULL!	#NULL!	#NULL!	#NULL!	#NULL!	#NULL!	#NULL!	#NULL!	#NULL!	#NULL!	#NULL!	#NULL!	#NULL!	#NULL!	#NULL!	#NULL!	#NULL!	#NULL!	#NULL!	#NULL!	#NULL!	#NULL!	#NULL!	#NULL!
#NULL!	#NULL!	#NULL!	#NULL!	#NULL!	#NULL!	#NULL!	#NULL!	#NULL!	#NULL!	#NULL!	#NULL!	#NULL!	#NULL!	#NULL!	#NULL!	#NULL!	#NULL!	#NULL!	#NULL!	#NULL!	#NULL!	#NULL!	#NULL!	#NULL!	#NULL!	#NULL!	#NULL!	#NULL!	#NULL!	#NULL!	#NULL!	#NULL!	#NULL!	#NULL!	#NULL!	#NULL!	#NULL!	#NULL!	#NULL!	#NULL!	#NULL!	#NULL!	#NULL!	#NULL!	#NULL!	#NULL!	#NULL!	#NULL!	#NULL!
#NULL!	#NULL!	#NULL!	#NULL!	#NULL!	#NULL!	#NULL!	#NULL!	#NULL!	#NULL!	#NULL!	#NULL!	#NULL!	#NULL!	#NULL!	#NULL!	#NULL!	#NULL!	#NULL!	#NULL!	#NULL!	#NULL!	#NULL!	#NULL!	#NULL!	#NULL!	#NULL!	#NULL!	#NULL!	#NULL!	#NULL!	#NULL!	#NULL!	#NULL!	#NULL!	#NULL!	#NULL!	#NULL!	#NULL!	#NULL!	#NULL!	#NULL!	#NULL!	#NULL!	#NULL!	#NULL!	#NULL!	#NULL!	#NULL!	#NULL!
#NULL!	#NULL!	#NULL!	#NULL!	#NULL!	#NULL!	#NULL!	#NULL!	#NULL!	#NULL!	#NULL!	#NULL!	#NULL!	#NULL!	#NULL!	#NULL!	#NULL!	#NULL!	#NULL!	#NULL!	#NULL!	#NULL!	#NULL!	#NULL!	#NULL!	#NULL!	#NULL!	#NULL!	#NULL!	#NULL!	#NULL!	#NULL!	#NULL!	#NULL!	#NULL!	#NULL!	#NULL!	#NULL!	#NULL!	#NULL!	#NULL!	#NULL!	#NULL!	#NULL!	#NULL!	#NULL!	#NULL!	#NULL!	#NULL!	#NULL!
#NULL!	#NULL!	#NULL!	#NULL!	#NULL!	#NULL!	#NULL!	#NULL!	#NULL!	#NULL!	#NULL!	#NULL!	#NULL!	#NULL!	#NULL!	#NULL!	#NULL!	#NULL!	#NULL!	#NULL!	#NULL!	#NULL!	#NULL!	#NULL!	#NULL!	#NULL!	#NULL!	#NULL!	#NULL!	#NULL!	#NULL!	#NULL!	#NULL!	#NULL!	#NULL!	#NULL!	#NULL!	#NULL!	#NULL!	#NULL!	#NULL!	#NULL!	#NULL!	#NULL!	#NULL!	#NULL!	#NULL!	#NULL!	#NULL!	#NULL!
#NULL!	#NULL!	#NULL!	#NULL!	#NULL!	#NULL!	#NULL!	#NULL!	#NULL!	#NULL!	#NULL!	#NULL!	#NULL!	#NULL!	#NULL!	#NULL!	#NULL!	#NULL!	#NULL!	#NULL!	#NULL!	#NULL!	#NULL!	#NULL!	#NULL!	#NULL!	#NULL!	#NULL!	#NULL!	#NULL!	#NULL!	#NULL!	#NULL!	#NULL!	#NULL!	#NULL!	#NULL!	#NULL!	#NULL!	#NULL!	#NULL!	#NULL!	#NULL!	#NULL!	#NULL!	#NULL!	#NULL!	#NULL!	#NULL!	#NULL!
#NULL!	#NULL!	#NULL!	#NULL!	#NULL!	#NULL!	#NULL!	#NULL!	#NULL!	#NULL!	#NULL!	#NULL!	#NULL!	#NULL!	#NULL!	#NULL!	#NULL!	#NULL!	#NULL!	#NULL!	#NULL!	#NULL!	#NULL!	#NULL!	#NULL!	#NULL!	#NULL!	#NULL!	#NULL!	#NULL!	#NULL!	#NULL!	#NULL!	#NULL!	#NULL!	#NULL!	#NULL!	#NULL!	#NULL!	#NULL!	#NULL!	#NULL!	#NULL!	#NULL!	#NULL!	#NULL!	#NULL!	#NULL!	#NULL!	#NULL!
#NULL!	#NULL!	#NULL!	#NULL!	#NULL!	#NULL!	#NULL!	#NULL!	#NULL!	#NULL!	#NULL!	#NULL!	#NULL!	#NULL!	#NULL!	#NULL!	#NULL!	#NULL!	#NULL!	#NULL!	#NULL!	#NULL!	#NULL!	#NULL!	#NULL!	#NULL!	#NULL!	#NULL!	#NULL!	#NULL!	#NULL!	#NULL!	#NULL!	#NULL!	#NULL!	#NULL!	#NULL!	#NULL!	#NULL!	#NULL!	#NULL!	#NULL!	#NULL!	#NULL!	#NULL!	#NULL!	#NULL!	#NULL!	#NULL!	#NULL!
#NULL!	#NULL!	#NULL!	#NULL!	#NULL!	#NULL!	#NULL!	#NULL!	#NULL!	#NULL!	#NULL!	#NULL!	#NULL!	#NULL!	#NULL!	#NULL!	#NULL!	#NULL!	#NULL!	#NULL!	#NULL!	#NULL!	#NULL!	#NULL!	#NULL!	#NULL!	#NULL!	#NULL!	#NULL!	#NULL!	#NULL!	#NULL!	#NULL!	#NULL!	#NULL!	#NULL!	#NULL!	#NULL!	#NULL!	#NULL!	#NULL!	#NULL!	#NULL!	#NULL!	#NULL!	#NULL!	#NULL!	#NULL!	#NULL!	#NULL!
#NULL!	#NULL!	#NULL!	#NULL!	#NULL!	#NULL!	#NULL!	#NULL!	#NULL!	#NULL!	#NULL!	#NULL!	#NULL!	#NULL!	#NULL!	#NULL!	#NULL!	#NULL!	#NULL!	#NULL!	#NULL!	#NULL!	#NULL!	#NULL!	#NULL!	#NULL!	#NULL!	#NULL!	#NULL!	#NULL!	#NULL!	#NULL!	#NULL!	#NULL!	#NULL!	#NULL!	#NULL!	#NULL!	#NULL!	#NULL!	#NULL!	#NULL!	#NULL!	#NULL!	#NULL!	#NULL!	#NULL!	#NULL!	#NULL!	#NULL!
#NULL!	#NULL!	#NULL!	#NULL!	#NULL!	#NULL!	#NULL!	#NULL!	#NULL!	#NULL!	#NULL!	#NULL!	#NULL!	#NULL!	#NULL!	#NULL!	#NULL!	#NULL!	#NULL!	#NULL!	#NULL!	#NULL!	#NULL!	#NULL!	#NULL!	#NULL!	#NULL!	#NULL!	#NULL!	#NULL!	#NULL!	#NULL!	#NULL!	#NULL!	#NULL!	#NULL!	#NULL!	#NULL!	#NULL!	#NULL!	#NULL!	#NULL!	#NULL!	#NULL!	#NULL!	#NULL!	#NULL!	#NULL!	#NULL!	#NULL!
#NULL!	#NULL!	#NULL!	#NULL!	#NULL!	#NULL!	#NULL!	#NULL!	#NULL!	#NULL!	#NULL!	#NULL!	#NULL!	#NULL!	#NULL!	#NULL!	#NULL!	#NULL!	#NULL!	#NULL!	#NULL!	#NULL!	#NULL!	#NULL!	#NULL!	#NULL!	#NULL!	#NULL!	#NULL!	#NULL!	#NULL!	#NULL!	#NULL!	#NULL!	#NULL!	#NULL!	#NULL!	#NULL!	#NULL!	#NULL!	#NULL!	#NULL!	#NULL!	#NULL!	#NULL!	#NULL!	#NULL!	#NULL!	#NULL!	#NULL!
#NULL!	#NULL!	#NULL!	#NULL!	#NULL!	#NULL!	#NULL!	#NULL!	#NULL!	#NULL!	#NULL!	#NULL!	#NULL!	#NULL!	#NULL!	#NULL!	#NULL!	#NULL!	#NULL!	#NULL!	#NULL!	#NULL!	#NULL!	#NULL!	#NULL!	#NULL!	#NULL!	#NULL!	#NULL!	#NULL!	#NULL!	#NULL!	#NULL!	#NULL!	#NULL!	#NULL!	#NULL!	#NULL!	#NULL!	#NULL!	#NULL!	#NULL!	#NULL!	#NULL!	#NULL!	#NULL!	#NULL!	#NULL!	#NULL!	#NULL!
#NULL!	#NULL!	#NULL!	#NULL!	#NULL!	#NULL!	#NULL!	#NULL!	#NULL!	#NULL!	#NULL!	#NULL!	#NULL!	#NULL!	#NULL!	#NULL!	#NULL!	#NULL!	#NULL!	#NULL!	#NULL!	#NULL!	#NULL!	#NULL!	#NULL!	#NULL!	#NULL!	#NULL!	#NULL!	#NULL!	#NULL!	#NULL!	#NULL!	#NULL!	#NULL!	#NULL!	#NULL!	#NULL!	#NULL!	#NULL!	#NULL!	#NULL!	#NULL!	#NULL!	#NULL!	#NULL!	#NULL!	#NULL!	#NULL!	#NULL!
#NULL!	#NULL!	#NULL!	#NULL!	#NULL!	#NULL!	#NULL!	#NULL!	#NULL!	#NULL!	#NULL!	#NULL!	#NULL!	#NULL!	#NULL!	#NULL!	#NULL!	#NULL!	#NULL!	#NULL!	#NULL!	#NULL!	#NULL!	#NULL!	#NULL!	#NULL!	#NULL!	#NULL!	#NULL!	#NULL!	#NULL!	#NULL!	#NULL!	#NULL!	#NULL!	#NULL!	#NULL!	#NULL!	#NULL!	#NULL!	#NULL!	#NULL!	#NULL!	#NULL!	#NULL!	#NULL!	#NULL!	#NULL!	#NULL!	#NULL!
#NULL!	#NULL!	#NULL!	#NULL!	#NULL!	#NULL!	#NULL!	#NULL!	#NULL!	#NULL!	#NULL!	#NULL!	#NULL!	#NULL!	#NULL!	#NULL!	#NULL!	#NULL!	#NULL!	#NULL!	#NULL!	#NULL!	#NULL!	#NULL!	#NULL!	#NULL!	#NULL!	#NULL!	#NULL!	#NULL!	#NULL!	#NULL!	#NULL!	#NULL!	#NULL!	#NULL!	#NULL!	#NULL!	#NULL!	#NULL!	#NULL!	#NULL!	#NULL!	#NULL!	#NULL!	#NULL!	#NULL!	#NULL!	#NULL!	#NULL!
#NULL!	#NULL!	#NULL!	#NULL!	#NULL!	#NULL!	#NULL!	#NULL!	#NULL!	#NULL!	#NULL!	#NULL!	#NULL!	#NULL!	#NULL!	#NULL!	#NULL!	#NULL!	#NULL!	#NULL!	#NULL!	#NULL!	#NULL!	#NULL!	#NULL!	#NULL!	#NULL!	#NULL!	#NULL!	#NULL!	#NULL!	#NULL!	#NULL!	#NULL!	#NULL!	#NULL!	#NULL!	#NULL!	#NULL!	#NULL!	#NULL!	#NULL!	#NULL!	#NULL!	#NULL!	#NULL!	#NULL!	#NULL!	#NULL!	#NULL!
#NULL!	#NULL!	#NULL!	#NULL!	#NULL!	#NULL!	#NULL!	#NULL!	#NULL!	#NULL!	#NULL!	#NULL!	#NULL!	#NULL!	#NULL!	#NULL!	#NULL!	#NULL!	#NULL!	#NULL!	#NULL!	#NULL!	#NULL!	#NULL!	#NULL!	#NULL!	#NULL!	#NULL!	#NULL!	#NULL!	#NULL!	#NULL!	#NULL!	#NULL!	#NULL!	#NULL!	#NULL!	#NULL!	#NULL!	#NULL!	#NULL!	#NULL!	#NULL!	#NULL!	#NULL!	#NULL!	#NULL!	#NULL!	#NULL!	#NULL!
#NULL!	#NULL!	#NULL!	#NULL!	#NULL!	#NULL!	#NULL!	#NULL!	#NULL!	#NULL!	#NULL!	#NULL!	#NULL!	#NULL!	#NULL!	#NULL!	#NULL!	#NULL!	#NULL!	#NULL!	#NULL!	#NULL!	#NULL!	#NULL!	#NULL!	#NULL!	#NULL!	#NULL!	#NULL!	#NULL!	#NULL!	#NULL!	#NULL!	#NULL!	#NULL!	#NULL!	#NULL!	#NULL!	#NULL!	#NULL!	#NULL!	#NULL!	#NULL!	#NULL!	#NULL!	#NULL!	#NULL!	#NULL!	#NULL!	#NULL!
#NULL!	#NULL!	#NULL!	#NULL!	#NULL!	#NULL!	#NULL!	#NULL!	#NULL!	#NULL!	#NULL!	#NULL!	#NULL!	#NULL!	#NULL!	#NULL!	#NULL!	#NULL!	#NULL!	#NULL!	#NULL!	#NULL!	#NULL!	#NULL!	#NULL!	#NULL!	#NULL!	#NULL!	#NULL!	#NULL!	#NULL!	#NULL!	#NULL!	#NULL!	#NULL!	#NULL!	#NULL!	#NULL!	#NULL!	#NULL!	#NULL!	#NULL!	#NULL!	#NULL!	#NULL!	#NULL!	#NULL!	#NULL!	#NULL!	#NULL!
#NULL!	#NULL!	#NULL!	#NULL!	#NULL!	#NULL!	#NULL!	#NULL!	#NULL!	#NULL!	#NULL!	#NULL!	#NULL!	#NULL!	#NULL!	#NULL!	#NULL!	#NULL!	#NULL!	#NULL!	#NULL!	#NULL!	#NULL!	#NULL!	#NULL!	#NULL!	#NULL!	#NULL!	#NULL!	#NULL!	#NULL!	#NULL!	#NULL!	#NULL!	#NULL!	#NULL!	#NULL!	#NULL!	#NULL!	#NULL!	#NULL!	#NULL!	#NULL!	#NULL!	#NULL!	#NULL!	#NULL!	#NULL!	#NULL!	#NULL!
#NULL!	#NULL!	#NULL!	#NULL!	#NULL!	#NULL!	#NULL!	#NULL!	#NULL!	#NULL!	#NULL!	#NULL!	#NULL!	#NULL!	#NULL!	#NULL!	#NULL!	#NULL!	#NULL!	#NULL!	#NULL!	#NULL!	#NULL!	#NULL!	#NULL!	#NULL!	#NULL!	#NULL!	#NULL!	#NULL!	#NULL!	#NULL!	#NULL!	#NULL!	#NULL!	#NULL!	#NULL!	#NULL!	#NULL!	#NULL!	#NULL!	#NULL!	#NULL!	#NULL!	#NULL!	#NULL!	#NULL!	#NULL!	#NULL!	#NULL!
#NULL!	#NULL!	#NULL!	#NULL!	#NULL!	#NULL!	#NULL!	#NULL!	#NULL!	#NULL!	#NULL!	#NULL!	#NULL!	#NULL!	#NULL!	#NULL!	#NULL!	#NULL!	#NULL!	#NULL!	#NULL!	#NULL!	#NULL!	#NULL!	#NULL!	#NULL!	#NULL!	#NULL!	#NULL!	#NULL!	#NULL!	#NULL!	#NULL!	#NULL!	#NULL!	#NULL!	#NULL!	#NULL!	#NULL!	#NULL!	#NULL!	#NULL!	#NULL!	#NULL!	#NULL!	#NULL!	#NULL!	#NULL!	#NULL!	#NULL!
#NULL!	#NULL!	#NULL!	#NULL!	#NULL!	#NULL!	#NULL!	#NULL!	#NULL!	#NULL!	#NULL!	#NULL!	#NULL!	#NULL!	#NULL!	#NULL!	#NULL!	#NULL!	#NULL!	#NULL!	#NULL!	#NULL!	#NULL!	#NULL!	#NULL!	#NULL!	#NULL!	#NULL!	#NULL!	#NULL!	#NULL!	#NULL!	#NULL!	#NULL!	#NULL!	#NULL!	#NULL!	#NULL!	#NULL!	#NULL!	#NULL!	#NULL!	#NULL!	#NULL!	#NULL!	#NULL!	#NULL!	#NULL!	#NULL!	#NULL!
#NULL!	#NULL!	#NULL!	#NULL!	#NULL!	#NULL!	#NULL!	#NULL!	#NULL!	#NULL!	#NULL!	#NULL!	#NULL!	#NULL!	#NULL!	#NULL!	#NULL!	#NULL!	#NULL!	#NULL!	#NULL!	#NULL!	#NULL!	#NULL!	#NULL!	#NULL!	#NULL!	#NULL!	#NULL!	#NULL!	#NULL!	#NULL!	#NULL!	#NULL!	#NULL!	#NULL!	#NULL!	#NULL!	#NULL!	#NULL!	#NULL!	#NULL!	#NULL!	#NULL!	#NULL!	#NULL!	#NULL!	#NULL!	#NULL!	#NULL!
#NULL!	#NULL!	#NULL!	#NULL!	#NULL!	#NULL!	#NULL!	#NULL!	#NULL!	#NULL!	#NULL!	#NULL!	#NULL!	#NULL!	#NULL!	#NULL!	#NULL!	#NULL!	#NULL!	#NULL!	#NULL!	#NULL!	#NULL!	#NULL!	#NULL!	#NULL!	#NULL!	#NULL!	#NULL!	#NULL!	#NULL!	#NULL!	#NULL!	#NULL!	#NULL!	#NULL!	#NULL!	#NULL!	#NULL!	#NULL!	#NULL!	#NULL!	#NULL!	#NULL!	#NULL!	#NULL!	#NULL!	#NULL!	#NULL!	#NULL!
#NULL!	#NULL!	#NULL!	#NULL!	#NULL!	#NULL!	#NULL!	#NULL!	#NULL!	#NULL!	#NULL!	#NULL!	#NULL!	#NULL!	#NULL!	#NULL!	#NULL!	#NULL!	#NULL!	#NULL!	#NULL!	#NULL!	#NULL!	#NULL!	#NULL!	#NULL!	#NULL!	#NULL!	#NULL!	#NULL!	#NULL!	#NULL!	#NULL!	#NULL!	#NULL!	#NULL!	#NULL!	#NULL!	#NULL!	#NULL!	#NULL!	#NULL!	#NULL!	#NULL!	#NULL!	#NULL!	#NULL!	#NULL!	#NULL!	#NULL!
#NULL!	#NULL!	#NULL!	#NULL!	#NULL!	#NULL!	#NULL!	#NULL!	#NULL!	#NULL!	#NULL!	#NULL!	#NULL!	#NULL!	#NULL!	#NULL!	#NULL!	#NULL!	#NULL!	#NULL!	#NULL!	#NULL!	#NULL!	#NULL!	#NULL!	#NULL!	#NULL!	#NULL!	#NULL!	#NULL!	#NULL!	#NULL!	#NULL!	#NULL!	#NULL!	#NULL!	#NULL!	#NULL!	#NULL!	#NULL!	#NULL!	#NULL!	#NULL!	#NULL!	#NULL!	#NULL!	#NULL!	#NULL!	#NULL!	#NULL!
[truncated: 233 more columns]
