# Supplementary material for: Contrasting Effects of Elevated Salinity on Thermotolerance of Red Sea Stylophora pistillata and Indonesian Montipora digitata
Source: Research Square preprint supplement (doi:10.21203/rs.3.rs-8223576/v1), 2025-12-02
Supplement: Supplementary file 2 [file f38c565a7f6588fd56dab7a9.xlsx]

## Sheet: General information
Tim Wijgerde, Michael Yeboah, Thomas van de Grootevheen, Tom Roebbers, Rick Verkooijen, Rosa van der Ven, Ronald Osinga
Marine Animal Ecology, Wageningen University, Wageningen University and Research, Wageningen, The Netherlands
The tabs in this Excel sheet contain several water quality parameters of the 16 aquaria measured during the course of the experiment.

## Sheet: calcium
Values expressed as mg L-1
27/03/2021 was defined as day 0 of the experiment
Aquarium	Treatment	2021-03-29	2021-03-31	2021-04-02	2021-04-05	2021-04-07	2021-04-09	2021-04-12	2021-04-14	2021-04-16	2021-04-19	2021-04-21	2021-04-23	2021-04-26	2021-04-28	2021-04-30	2021-05-03	2021-05-05	2021-05-07	2021-05-10	2021-05-12	2021-05-14	2021-05-17
7	35C	-	395	-	420	-	410	-	410	-	410	-	400	-	415	-	395	-	410	-	400	-	410
5	35C	-	400	-	400	-	400	-	405	-	395	-	390	-	410	-	395	-	410	-	400	-	420
1	35C	405	-	375	-	405	-	410	-	410	-	410	-	410	-	410	-	410	-	410	-	400	-
3	35C	400	-	400	-	400	-	410	-	415	-	415	-	410	-	415	-	415	-	410	-	400	-
9	35H	-	395	-	400	-	410	-	410	-	410	-	400	-	400	-	395	-	410	-	410	-	410
11	35H	-	400	-	400	-	415	-	415	-	410	-	410	-	405	-	400	-	410	-	410	-	410
13	35H	400	-	410	-	400	-	410	-	410	-	405	-	390	-	395	-	390	-	410	-	410	-
15	35H	400	-	310	395	410	-	400	-	415	-	400	-	400	-	400	-	410	-	410	-	410	-
6	42C	-	420	-	460	-	490	-	495	-	480	-	500	-	500	-	480	-	510	-	510	-	510
8	42C	-	420	-	450	-	490	-	490	-	490	-	490	-	490	-	485	-	490	-	510	-	500
2	42C	400	-	420	-	450	-	490	-	490	-	490	-	500	-	500	-	480	-	480	-	510	-
4	42C	400	-	420	-	450	-	495	-	480	-	480	-	490	-	500	-	500	-	500	-	510	-
10	42H	-	410	-	425	-	490	-	480	-	490	-	470	-	480	-	495	-	495	-	510	-	510
12	42H	-	430	-	425	-	495	-	480	-	490	-	480	-	485	-	495	-	495	-	490	-	500
14	42H	395	-	430	-	450	-	495	-	495	-	470	-	485	-	495	-	490	-	510	-	510	-
16	42H	400	-	425	-	460	-	480	-	490	-	475	-	485	-	495	-	500	-	500	-	490	-
	35C	35 PSU Control
	35H	35 PSU Heatwave
	42C	42 PSU Control
	42H	42 PSU Heatwave

## Sheet: alkalinity
Values expressed as mEq L-1
27/03/2021 was defined as day 0 of the experiment
Aquarium	Treatment	2021-03-29	2021-03-31	2021-04-02	2021-04-05	2021-04-07	2021-04-09	2021-04-12	2021-04-14	2021-04-16	2021-04-19	2021-04-21	2021-04-23	2021-04-26	2021-04-28	2021-04-30	2021-05-03	2021-05-05	2021-05-07	2021-05-10	2021-05-12	2021-05-14	2021-05-17
1	35C	2.6	-	2.5	-	2.4	-	2.2	-	2.3	-	2.3	-	2.1	-	2.2	-	2.1	-	2.2	-	NA	-
3	35C	2.6	-	2.4	-	2.2	-	2.2	-	2.3	-	2.3	-	2.2	-	2.1	-	2	-	2.2	-	NA	-
5	35C	-	2.5	-	2.5	-	2.4	-	2.2	-	2.3	-	2.2	-	2.1	-	2.3	-	2.1	-	NA	-	3
7	35C	-	2.7	-	2.3	-	2.4	-	2.2	-	2.2	-	2.2	-	2.1	-	2.1	-	2.2	-	NA	-	3.1
9	35H	-	2.5	-	2.3	-	2.4	-	2.2	-	2.2	-	2	-	2.1	-	2.2	-	2.2	-	NA	-	3
11	35H	-	2.7	-	2.3	-	2.6	-	2.4	-	2.3	-	2.2	-	2.2	-	2.3	-	2.2	-	NA	-	3.1
13	35H	2.7	-	2.4	-	2.4	-	2.4	-	2.2	-	2.1	-	2	-	2.1	-	2	-	2.2	-	NA	-
15	35H	2.6	-	2.4	-	2.4	-	2.4	-	2.1	-	2.2	-	2.1	-	2	-	2.1	-	2.2	-	NA	-
2	42C	2.6	-	2.8	-	2.8	-	2.9	-	2.9	-	2.8	-	2.7	-	2.8	-	2.7	-	2.6	-	NA	-
4	42C	2.7	-	2.9	-	2.9	-	2.9	-	3	-	2.8	-	2.8	-	3	-	3	-	3.3	-	NA	-
6	42C	-	2.8	-	2.7	-	2.9	-	2.8	-	2.9	-	2.8	-	2.7	-	3.2	-	3.2	-	NA	-	3.5
8	42C	-	2.8	-	2.7	-	3	-	2.9	-	2.9	-	2.8	-	2.8	-	2.8	-	2.8	-	NA	-	3.7
10	42H	-	2.7	-	2.7	-	2.9	-	2.8	-	3	-	2.8	-	2.8	-	3.1	-	3.2	-	NA	-	3.7
12	42H	-	2.7	-	2.6	-	3	-	2.7	-	2.9	-	2.8	-	2.8	-	3.1	-	3.2	-	NA	-	3.8
14	42H	2.6	-	2.8	-	2.8	-	2.8	-	2.9	-	2.9	-	2.7	-	2.9	-	3.1	-	3.2	-	NA	-
16	42H	2.6	-	2.9	-	2.7	-	2.8	-	3	-	2.7	-	2.8	-	2.9	-	2.7	-	3.3	-	NA	-
	35C	35 PSU Control
	35H	35 PSU Heatwave
	42C	42 PSU Control
	42H	42 PSU Heatwave

## Sheet: nitrate
Values expressed as mg L-1
27/03/2021 was defined as day 0 of the experiment
Aquarium	Treatment	2021-03-29	2021-03-31	2021-04-02	2021-04-05	2021-04-07	2021-04-09	2021-04-12	2021-04-14	2021-04-16	2021-04-19	2021-04-21	2021-04-23	2021-04-26	2021-04-28	2021-04-30	2021-05-03	2021-05-05	2021-05-07	2021-05-10	2021-05-12	2021-05-14	2021-05-17
1	35C	0-0.25	0-0.25	0-0.25	0-0.25	0-0.25	0-0.25	0-0.25	0-0.25	0-0.25	0-0.25	0-0.25	0-0.25	0-0.25	0-0.25	0-0.25	0-0.25	0-0.25	0-0.25	0-0.25	0-0.25	0-0.25	0-0.25
3	35C	0-0.25	0-0.25	0-0.25	0-0.25	0-0.25	0-0.25	0-0.25	0-0.25	0-0.25	0-0.25	0-0.25	0-0.25	0-0.25	0-0.25	0-0.25	0-0.25	0-0.25	0-0.25	0-0.25	0-0.25	0-0.25	0-0.25
5	35C	0-0.25	0-0.25	0-0.25	0-0.25	0-0.25	0-0.25	0-0.25	0-0.25	0-0.25	0-0.25	0-0.25	0-0.25	0-0.25	0-0.25	0-0.25	0-0.25	0-0.25	0-0.25	0-0.25	0-0.25	0-0.25	0-0.25
7	35C	0-0.25	0-0.25	0-0.25	0-0.25	0-0.25	0-0.25	0-0.25	0-0.25	0-0.25	0-0.25	0-0.25	0-0.25	0-0.25	0-0.25	0-0.25	0-0.25	0-0.25	0-0.25	0-0.25	0-0.25	0-0.25	0-0.25
9	35H	0-0.25	0-0.25	0-0.25	0-0.25	0-0.25	0-0.25	0-0.25	0	0-0.25	0-0.25	0-0.25	0-0.25	0-0.25	0-0.25	0-0.25	0-0.25	0-0.25	0-0.25	0-0.25	0-0.25	0-0.25	0-0.25
11	35H	0-0.25	0-0.25	0-0.25	0-0.25	0-0.25	0-0.25	0-0.25	0-0.25	0-0.25	0-0.25	0-0.25	0-0.25	0-0.25	0-0.25	0-0.25	0-0.25	0-0.25	0-0.25	0-0.25	0-0.25	0-0.25	0-0.25
13	35H	0-0.25	0-0.25	0-0.25	0-0.25	0-0.25	0-0.25	0-0.25	0	0-0.25	0-0.25	0-0.25	0-0.25	0-0.25	0-0.25	0-0.25	0-0.25	0-0.25	0-0.25	0-0.25	0-0.25	0-0.25	0-0.25
15	35H	0-0.25	0-0.25	0-0.25	0-0.25	0-0.25	0-0.25	0-0.25	0	0-0.25	0-0.25	0-0.25	0-0.25	0-0.25	0-0.25	0-0.25	0-0.25	0-0.25	0-0.25	0-0.25	0-0.25	0-0.25	0-0.25
2	42C	0-0.25	0-0.25	0-0.25	0-0.25	0-0.25	0-0.25	0-0.25	0-0.25	0-0.25	0-0.25	0-0.25	0-0.25	0-0.25	0-0.25	0-0.25	0-0.25	0-0.25	0-0.25	0-0.25	0-0.25	0-0.25	0-0.25
4	42C	0-0.25	0-0.25	0-0.25	0-0.25	0-0.25	0-0.25	0-0.25	0-0.25	0-0.25	0-0.25	0-0.25	0-0.25	0-0.25	0-0.25	0-0.25	0-0.25	0-0.25	0-0.25	0-0.25	0-0.25	0-0.25	0-0.25
6	42C	0-0.25	0-0.25	0-0.25	0-0.25	0-0.25	0-0.25	0-0.25	0	0-0.25	0-0.25	0-0.25	0-0.25	0-0.25	0-0.25	0-0.25	0-0.25	0-0.25	0-0.25	0-0.25	0-0.25	0-0.25	0-0.25
8	42C	0-0.25	0-0.25	0-0.25	0-0.25	0-0.25	0-0.25	0-0.25	0	0-0.25	0-0.25	0-0.25	0-0.25	0-0.25	0-0.25	0-0.25	0-0.25	0-0.25	0-0.25	0-0.25	0-0.25	0-0.25	0-0.25
10	42H	0-0.25	0-0.25	0-0.25	0-0.25	0-0.25	0-0.25	0-0.25	0-0.25	0-0.25	0-0.25	0-0.25	0-0.25	0-0.25	0-0.25	0-0.25	0-0.25	0-0.25	0-0.25	0-0.25	0-0.25	0-0.25	0-0.25
12	42H	0-0.25	0-0.25	0-0.25	0-0.25	0-0.25	0-0.25	0-0.25	0-0.25	0-0.25	0-0.25	0-0.25	0-0.25	0-0.25	0-0.25	0-0.25	0-0.25	0-0.25	0-0.25	0-0.25	0-0.25	0-0.25	0-0.25
14	42H	0-0.25	0-0.25	0-0.25	0-0.25	0-0.25	0-0.25	0-0.25	0-0.25	0-0.25	0-0.25	0-0.25	0-0.25	0-0.25	0-0.25	0-0.25	0-0.25	0-0.25	0-0.25	0-0.25	0-0.25	0-0.25	0-0.25
16	42H	0-0.25	0-0.25	0-0.25	0-0.25	0-0.25	0-0.25	0-0.25	0	0-0.25	0-0.25	0-0.25	0-0.25	0-0.25	0-0.25	0-0.25	0-0.25	0-0.25	0-0.25	0-0.25	0-0.25	0-0.25	0-0.25
	35C	35 PSU Control
	35H	35 PSU Heatwave
	42C	42 PSU Control
	42H	42 PSU Heatwave

## Sheet: phosphate
Values expressed as mg L-1
27/03/2021 was defined as day 0 of the experiment
Aquarium	Treatment	2021-03-29	2021-03-31	2021-04-02	2021-04-05	2021-04-07	2021-04-09	2021-04-12	2021-04-14	2021-04-16	2021-04-19	2021-04-21	2021-04-23	2021-04-26	2021-04-28	2021-04-30	2021-05-03	2021-05-05	2021-05-07	2021-05-10	2021-05-12	2021-05-14	2021-05-17
1	35C	0-0.01	0.01	0.01	0.01	0-0.01	0	0.01	0.01-0.02	0.01	0	0-0.01	0	0	0	0.01	0.01	0-0.01	0-0.01	0-0.01	0-0.01	0-0.01	0-0.01
3	35C	0-0.01	0	0.01	0.01	0.01	0-0.01	0.01	0	0.01	0	0.01	0	0	0-0.01	0.01	0.01	0.01	0.01	0-0.01	0.01	0.01	0.01
5	35C	0	0.01	0-0.01	0.01-0.02	0	0	0.01	0	0	0-0.01	0.01	0-0.01	0	0	0.01	0-0.01	0-0.01	0-001	0-0.01	0-0.01	0-0.01	0.01
7	35C	0.01	0	0.01	0-0.01	0-0.01	0	0-0.01	0-0.01	0-0.01	0-0.01	0	0-0.01	0	0	0-0.01	0.01	0-0.01	0-0.01	0	0-0.01	0-0.01	0-0.01
9	35H	0.01	0	0-0.01	0.01-0.02	0.01	0	0-0.01	0.01	0-0.01	0-0.01	0	0-0.01	0-0.01	0-0.01	0.01	0-0.01	0-0.01	0-0.01	0-0.01	0-0.01	0.01-0.02	0.08
11	35H	0	0.01-0.02	0.01	0.01-0.02	0	0-0.01	0.01	0.01	0	0	0	0-0.01	0-0.01	0	0.01	0-0.01	0-0.01	0-0.01	0-0.01	0-0.01	0-0.01	0.08
13	35H	0	0.02	0-0.01	0.01	0-0.01	0	0-0.01	0-0.01	0	0-0.01	0-0.01	0	0	0	0-0.01	0-0.01	0-0.01	0-0.01	0	0-0.01	0-0.01	0.08
15	35H	0-0.01	0-0.01	0.01	0.01	0.01	0-0.01	0-0.01	0	0	0-0.01	0.01	0-0.01	0	0	0-0.01	0-0.01	0-0.01	0-0.01	0-0.01	0-0.01	0-0.01	0.01
2	42C	0-0.01	0	0.01	0-0.01	0	0-0.01	0-0.01	0-0.01	0-0.01	0	0.01	0-0.01	0-0.01	0-0.01	0-0.01	0.01	0-0.01	0-0.01	0-0.01	0-0.01	0.01	0.01
4	42C	0.01	0.01	0.01-0.02	0.01	0-0.01	0	0.01	0	0	0	0	0	0-0.01	0-0.01	0.01	0.01	0-0.01	0-0.01	0-0.01	0-0.01	0-0.01	0.01
6	42C	0	0.01	0.01	0	0.01	0-0.01	0-0.01	0	0.01	0-0.01	0	0-0.01	0-0.01	0	0.01	0.01	0.01	0.01	0-0.01	0-0.01	0.01-0.02	0.01
8	42C	0.01	0.01	0.01	0.01	0.01	0-0.01	0-0.01	0.01	0	0.01	0	0-0.01	0	0	0-0.01	0-0.01	0-0.01	0-0.01	0-0.01	0-0.01	0.01	0-0.01
10	42H	0.01	0.01	0.01	0.01	0	0	0.01	0.01	0	0	0-0.01	0-0.01	0	0-0.01	0-0.01	0-0.01	0-0.01	0-0.01	0-0.01	0.01	0-0.01	0.08
12	42H	0.01	0.01	0-0.01	0-0.01	0.01	0	0-0.01	0.01	0-0.01	0-0.01	0	0-0.01	0	0	0-0.01	0-0.01	0-0.01	0-0.01	0-0.01	0-0.01	0.01-0.02	0.08
14	42H	0-0.01	0	0.01	0-0.01	0-0.01	0-0.01	0.01	0	0	0	0-0.01	0	0	0-0.01	0-0.01	0-0.01	0-0.01	0-0.01	0-0.01	0-0.01	0	0.08
16	42H	0	0.01-0.02	0-0.01	0.01	0.01	0	0.01	0-0.01	0-0.01	0-0.01	0.01	0-0.01	0	0-0.01	0-0.01	0-0.01	0-0.01	0-0.01	0.1	0-0.01	0-0.01	0.02-0.04
	35C	35 PSU Control
	35H	35 PSU Heatwave
	42C	42 PSU Control
	42H	42 PSU Heatwave

## Sheet: oxygen
Values expressed as mg L-1
27/03/2021 was defined as day 0 of the experiment
Aquarium	Treatment	2021-03-27	2021-03-28	2021-03-29	2021-03-30	2021-03-31	2021-04-01	2021-04-02	2021-04-03	2021-04-04	2021-04-05	2021-04-06	2021-04-07	2021-04-08	2021-04-09	2021-04-10	2021-04-11	2021-04-12	2021-04-13	2021-04-14	2021-04-15	2021-04-16	2021-04-17	2021-04-18	2021-04-19	2021-04-20	2021-04-21	2021-04-22	2021-04-23	2021-04-24	2021-04-25	2021-04-26	2021-04-27	2021-04-28	2021-04-29	2021-04-30	2021-05-01	2021-05-02	2021-05-03	2021-05-04	2021-05-05	2021-05-06	2021-05-07	2021-05-08	2021-05-09	2021-05-10	2021-05-11	2021-05-12	2021-05-13
1	35C	6.17	6.21	6.27	6.28	6.11	6.01	6.14	6.05	6.16	5.82	6	5.99	6.16	6.3	6.33	6.35	6.48	6.26	6.38	6.3	6.42	6.34	6.29	6.28	6.42	6.25	6.18	6.51	6.29	6.4	6.41	6.12	6.22	6.04	6.13	6.1	6.38	6	5.84	5.8	6.15	6.28	6.27	5.9	5.84	6.34	6.4	6.39
3	35C	6.23	6.24	6.27	6.32	6.15	6.06	6.1	6.02	6.05	5.91	5.94	6.14	6.24	6.35	6.15	6.3	6.39	6.15	6.28	6.27	6.37	6.34	6.21	6.23	6.3	6.18	6.18	6.34	6.18	6.29	6.22	6.02	6.16	6.09	6.14	6.15	6.35	6.05	5.89	5.9	6.09	6.25	6.15	5.96	5.93	6.25	6.42	6.49
5	35C	6.15	6.22	6.33	6.27	6.15	6.05	6.14	6.06	6.06	5.93	5.89	6.15	6.13	6.31	6.15	6.29	6.4	6.26	6.35	6.34	6.38	6.31	6.28	6.23	6.31	6.21	6.27	6.4	6.18	6.31	6.28	6.07	6.22	6.11	6.22	6.43	6.34	6.18	6	5.99	6.13	6.29	6.26	6.09	6.08	6.24	6.37	6.32
7	35C	6.12	6.24	6.36	6.31	6.12	6.11	6.21	6.11	6.08	5.94	5.94	6.17	6.23	6.34	6.15	6.27	6.39	6.27	6.4	6.27	6.45	6.45	6.36	6.26	6.38	6.26	6.33	6.43	6.2	6.39	6.3	6.07	6.24	6.24	6.31	6.47	6.46	6.33	6.18	6.19	6.28	6.33	6.21	6.18	6.18	6.25	6.48	6.38
9	35H	6.22	6.21	6.27	6.32	6.21	6.13	6.22	6.16	6.16	5.94	6.17	6.25	6.33	6.37	6.14	6.33	6.28	6.15	6.33	6.3	6.26	6.36	6.16	6.11	6.1	6.08	6.18	6.08	6.13	6.14	5.96	5.7	5.84	5.87	5.87	5.79	6.03	5.77	5.6	5.45	5.56	5.66	5.5	5.27	5.46	5.34	5.62	5.45
11	35H	6.21	6.25	6.25	6.27	6.23	6.02	6.2	6.1	6.04	5.94	6.01	6.21	6.26	6.35	6.19	6.3	6.3	6.2	6.34	6.24	6.35	6.3	6.24	6.16	6.12	6.09	6.18	6.17	6.1	6.19	6.04	5.71	5.82	5.91	5.91	5.88	5.98	5.84	5.66	5.58	5.61	5.77	5.7	5.45	5.51	5.19	5.76	5.47
13	35H	6.2	6.26	6.25	6.29	6.14	6.01	6.1	6.04	6.06	5.84	5.94	6.15	6.15	6.33	6.27	6.29	6.42	6.37	6.47	6.3	6.28	6.35	6.2	6.16	6.19	6.2	6.16	6.11	6.01	6.1	6.05	5.63	5.81	5.91	5.9	5.81	5.98	5.75	5.7	5.57	5.72	5.76	5.66	5.5	5.55	5.48	5.71	5.48
15	35H	6.21	6.26	6.27	6.3	6.22	6.13	6.12	6.05	6.06	5.91	5.91	6.21	6.12	6.34	6.28	6.28	6.41	6.19	6.47	6.18	6.34	6.36	6.32	6.13	6.14	6.05	6.17	6.13	5.98	6.1	6.02	5.66	5.78	5.9	5.94	5.85	5.98	5.82	5.7	5.64	5.68	5.79	5.58	5.53	5.39	5.36	5.68	5.54
2	42C	6.15	6.21	6.28	6.24	6.07	6	6.07	6.05	6.04	5.84	5.97	6.02	6.17	6.37	6.09	6.12	6.36	6	6.08	6.18	6.42	6.35	6.16	6.03	6.4	6.01	6.11	6.24	6.21	6.12	6.31	6.08	5.99	6.02	6.03	6.02	6.16	6.16	5.94	5.97	5.82	6.12	6.15	6.02	5.73	6.03	6.17	6.08
4	42C	6.19	6.22	6.37	6.31	6.18	6.11	6.08	6.05	6.07	5.89	5.97	6.05	6.1	6.22	6.11	6.09	6.36	6.08	6.15	6.17	6.36	6.29	6.18	6.08	6.39	6.04	6.18	6.26	6.24	6.21	6.23	6.12	6.04	6.04	6.11	6.13	6.12	6.2	5.96	6	5.98	6.12	6.13	5.99	5.82	6	6.15	5.97
6	42C	6.18	6.23	6.31	6.3	6.12	5.97	6.27	6.07	6.07	5.94	5.91	6.04	6.14	6.34	6.02	6.09	6.46	6.1	6.18	6.1	6.32	6.17	6.15	6.13	6.41	6.02	6.16	6.22	6.31	6.16	6.18	6.11	6.04	6.06	6.13	6.13	6.24	6.16	5.94	5.98	6.07	6.05	6.08	5.94	5.83	5.97	6.09	5.97
8	42C	6.19	6.27	6.36	6.32	6.19	6.09	6.22	6.12	6.13	5.96	5.96	6.11	6.1	6.35	6.1	6.09	6.4	6.05	6.19	6.18	6.28	6.24	6.16	6.1	6.44	6.06	6.17	6.24	6.31	6.23	6.19	6.12	6.07	6.09	6.16	6.19	6.25	6.12	5.97	6.03	6.1	6.11	6.13	5.83	5.83	5.92	6.07	5.99
10	42H	6.17	6.22	6.24	6.22	6.21	6.09	6.14	6.14	6.07	5.92	6.09	6.18	6.19	6.32	6.1	6.15	6.5	6.15	6.22	6.17	6.13	6.18	6.02	5.91	6.29	5.88	5.93	5.98	6.11	5.92	5.9	5.81	5.64	5.78	5.85	5.88	5.91	5.81	5.68	5.69	5.77	6.69	5.74	5.31	5.45	5.41	5.7	5.44
12	42H	6.22	6.18	6.22	6.22	6.14	5.91	6.14	6.07	6.13	5.95	5.95	6.15	6.11	6.27	6.04	6.08	6.44	6.06	6.19	6.08	6.16	6.16	6.07	5.96	6.2	5.94	5.97	5.94	6.03	5.92	5.88	5.76	5.66	5.73	5.81	5.73	5.81	5.71	5.57	5.15	5.58	5.62	5.65	5.29	5.36	5.37	5.68	5.38
14	42H	6.21	6.28	6.27	6.28	6.21	6.11	6.14	6.04	6.04	5.86	5.91	6.11	6.1	6.27	6.12	6.07	6.39	6.03	6.21	6.08	6.06	6.18	6.05	5.95	6.17	5.86	5.96	5.93	6.07	5.97	5.97	5.82	5.77	5.72	5.82	5.47	5.75	5.67	5.55	5.46	5.56	5.48	5.53	5.52	5.2	5.1	5.58	5.36
16	42H	6.17	6.24	6.26	6.3	6.19	6.13	6.14	6.04	6.01	5.91	5.94	6.07	5.97	6.28	6.09	6.09	6.4	6.09	6.17	6.02	6.12	6.16	6.03	5.92	6.19	5.81	5.95	5.92	6.01	5.88	5.84	6.66	5.6	6.62	5.79	5.71	5.75	6.65	5.52	5.43	5.55	4.46	5.5	5.78	5.34	5.19	5.68	5.35
	35C	35 PSU Control
	35H	35 PSU Heatwave
	42C	42 PSU Control
	42H	42 PSU Heatwave
[truncated: 6 more columns]

## Sheet: pH
27/03/2021 was defined as day 0 of the experiment
Aquarium	Treatment	2021-03-29	2021-03-31	2021-04-02	2021-04-05	2021-04-07	2021-04-09	2021-04-12	2021-04-14	2021-04-16	2021-04-19	2021-04-21	2021-04-23	2021-04-26	2021-04-28	2021-04-30	2021-05-03	2021-05-05	2021-05-07	2021-05-10	2021-05-12	2021-05-17
1	35C	8.03	-	8.05	-	7.99	-	7.92	-	8	-	8.03	-	7.95	-	7.9	-	8.21	-	NA	-	-
3	35C	8.03	-	7.89	-	7.88	-	7.86	-	8.07	-	8.05	-	7.88	-	7.82	-	7.94	-	7.93	-	-
5	35C	-	7.98	-	8.14	-	7.89	-	7.82	-	8.1	-	7.97	-	7.91	-	7.97	-	7.98	-	NA	8.3
7	35C	-	8.05	-	7.99	-	7.96	-	7.9	-	8.01	-	8.02	-	7.94	-	7.93	-	8.09	-	NA	8.12
9	35H	-	8.01	-	7.98	-	7.93	-	7.84	-	7.94	-	7.94	-	7.9	-	7.97	-	8.31	-	NA	8.26
11	35H	-	8.12	-	8	-	7.9	-	7.96	-	8.05	-	8.02	-	7.98	-	8.04	-	8.11	-	NA	8.29
13	35H	7.93	-	7.99	-	7.81	-	7.97	-	7.94	-	7.87	-	7.8	-	7.86	-	7.94	-	8.11	-	-
15	35H	7.92	-	8.04	-	7.86	-	7.93	-	7.98	-	8	-	7.89	-	7.87	-	8.26	-	8.2	-	-
2	42C	7.94	-	8.09	-	7.98	-	8.06	-	8.13	-	8.06	-	8.04	-	7.92	-	8.13	-	7.96	-	-
4	42C	8.03	-	8.1	-	8.03	-	8.1	-	8.13	-	8.1	-	8.02	-	7.96	-	8.32	-	8.23	-	-
6	42C	-	8.07	-	8.07	-	8.03	-	8.1	-	8.13	-	8.09	-	8.02	-	8.24	-	8.31	-	NA	8.12
8	42C	-	8.04	-	8.08	-	8.1	-	8.07	-	8.13	-	8.1	-	8.02	-	8.11	-	8.17	-	NA	7.96
10	42H	-	7.99	-	8	-	7.97	-	7.98	-	8.11	-	8.07	-	8.05	-	8.22	-	8.16	-	NA	8.18
12	42H	-	7.94	-	7.96	-	7.99	-	7.98	-	8.02	-	8.07	-	8.02	-	8.16	-	8.24	-	NA	8.12
14	42H	7.93	-	7.98	-	7.96	-	7.95	-	8.07	-	8.05	-	7.96	-	7.92	-	8.18	-	8.01	-	-
16	42H	8.02	-	8.02	-	7.93	-	7.96	-	8.06	-	7.96	-	8.07	-	8	-	8.1	-	8.23	-	-
	35C	35 PSU Control
	35H	35 PSU Heatwave
	42C	42 PSU Control
	42H	42 PSU Heatwave
